# Supplementary material for: Synthesis and detonation characters of 3,4,5-1H-trinitropyrazole and its nitrogen-rich energetic salts
Source: Royal Society of Chemistry journal article supplement (doi:10.1039/d3dt03683a), 2023-12-27
Supplement: d3dt03683a1.pdf [file d3dt03683a1.pdf]

## Supporting Information

### Synthesis and detonation characters of 3,4,5-1*H*-trinitropyrazole and its nitrogen-rich energetic salts

Chenchen Lin,<sup>a</sup> Pingping Yi,<sup>a</sup> Xiaoyi Yi,<sup>a</sup> Piao He,<sup>\*a</sup> Tingwei Wng<sup>b</sup> and Jianguo Zhang<sup>b</sup>

<sup>a</sup> *College of Chemistry and Chemical Engineering, Central South University, Changsha 410083, Hunan, P. R. China. Email: [piaohe@csu.edu.cn](mailto:piaohe@csu.edu.cn).*

<sup>b</sup> *State Key Laboratory of Explosion Science and Technology, Beijing Institute of Technology, Beijing 100081 P. R. China.*

## **Table of contents**

1. Experimental Part
2. X-ray Crystallographic Data
3. Characterization analysis
4. Computational Datasets
5. Heat of Formation Calculation
6. Hirshfeld Analysis
7. Optimization
8. References

## 1. Experimental Part

All chemicals and solvents were employed as received. The  $^1\text{H}$  NMR and  $^{13}\text{C}$  NMR spectra were recorded on a Bruker AVANCE(III) 400 M spectrometer. The infrared spectra (in KBr) were recorded on a Nicolet 6700 FT-IR spectrophotometer. ESI-MS was performed in a Bruker Daltonik GmbH, Bremen mass spectrometer equipped with an electrospray ionization (ESI) source. The density was measured by gas pycnometer (25 °C). The thermal behavior of the compound (0.2 mg, aluminium crucibles) was analyzed by differential scanning calorimeter (TGA/DSC, METTLER TOLEDO STAR system), with the heating rate of 5 °C·min<sup>-1</sup> and N<sub>2</sub> gas atmosphere with a heat flow 80 mL/min. The mechanical sensitivities (including impact sensitivity and friction sensitivity) were determined by the standard step method of the drop weight device with a BAM DFH-10 device with a weight drop of 5 kg. The molecular structure in the crystalline state was determined by using Bruker smart Apex 2, Bruker D8 Venture. The solution and refinement of the structure was performed using the program OLEX2 software<sup>1</sup> (SHELEX-97<sup>2</sup> was implemented) and finally checked with the PLATON software<sup>3</sup>. CCDC-2240955 (**1a**) contains the supplementary crystallographic data for this paper. These data can be obtained free of charge from The Cambridge Crystallographic Data Centre via [www.ccdc.cam.ac.uk/data\\_request/cif](http://www.ccdc.cam.ac.uk/data_request/cif).

*Caution! All of these compounds are potentially energetic materials. This necessitates additional meticulous safety precautions (ear plugs, face shield and Kevlar gloves etc).*

### 1.1. 3,4-diamino-1,2,4-1H-triazole (DATr)

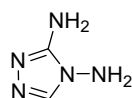

DATr

Diaminoguanidine hydrochloride (5 g, 40 mmol) and formic acid (8 mL, 85%) was added to a 100 mL two necked bottle, the mixture was stirred and refluxed at 110 °C for 1 h, then concentrated hydrochloric acid (12 mL) was added and continue reflux for 1 h. Depressurize the reaction solution to half, Freeze in the refrigerator overnight to precipitate white solids, The precipitated solid was filtered, washed with ethanol and diethyl ether, and dried in air to give DATr·HCl (5.13 g, 95.0%). Dissolve DATr·HCl (0.27 g, 2 mmol) in 5mL of water, sodium bicarbonate (0.168 g, 2 mmol) was added to adjust the solution to pH=7, and then spin dry the solvent. Extract the DATr with methanol, and concentrated to get a white powder DATr (0.16 g, 82%)<sup>4</sup>.  $^1\text{H}$  NMR (400 MHz, DMSO):  $\delta$  = 8.42 (1H, s), 8.25 (2H, s), 6.16 (2H, s) ppm.

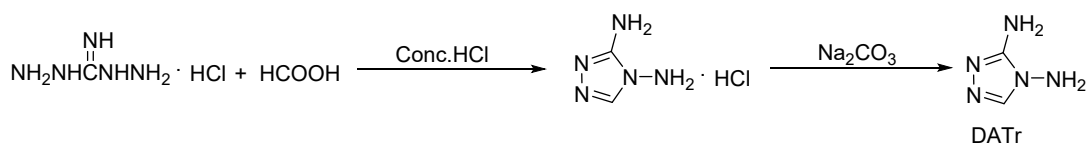

**Scheme 1.** Synthetic pathway towards DATr.

## 1.2. 3-hydraziono-4-amino-1,2,4-1H-triazole(HATr)

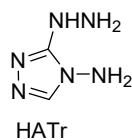

Triaminoguanidine hydrochloride (5.64 g, 40 mmol) and formic acid (8 mL, 85%) was added to a 100 mL two necked bottle, the mixture was stirred and refluxed at 110 °C for 1 h, then concentrated hydrochloric acid (12 mL) was added and continue reflux for 0.5 h. Depressurize the reaction solution to half, Freeze in the refrigerator overnight to precipitate white solids, The precipitated solid was filtered, washed with ethanol and methanol, and dried in air to give HATr·2HCl (6.99 g, 94.0%). Dissolve HATr·2HCl (0.27 g, 2 mmol) in 5mL of water, sodium bicarbonate (0.168 g, 2 mmol) was added to adjust the solution to pH=7, and then spin dry the solvent. Extract the HATr with methanol, and concentrated to get a white powder HATr<sup>5</sup>. <sup>1</sup>H NMR (400 MHz, DMSO): δ = 9.61 (1H, s), 8.78 (1H, s), 5.88 (2H, s), 5.75 (2H, s) ppm.

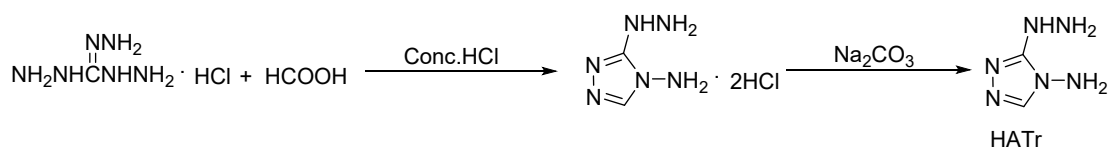

Scheme 2. Synthetic pathway towards HATr.

## 1.3. 3,4,5-trinitro-1H-pyrazole (HTNP)

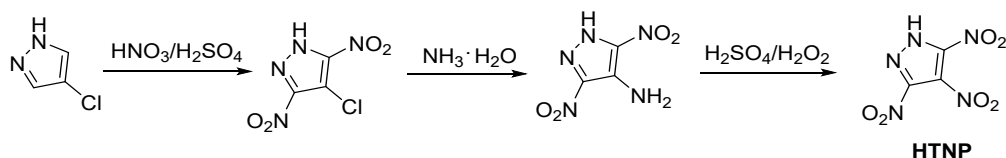

Scheme 3. Synthetic pathway towards HTNP.

### 1.3.1 4-chloro-3,5-dinitro-1H-pyrazole

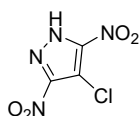

4-chloro-1H-pyrazole (15.6 g, 0.12 mol) was dissolved in concentrated sulfuric acid (190 mL), then concentrated nitric acid (20 mL) was added dropwise at 15-25 °C, the temperature was slowly raised to 100 °C After stirring for 5 h, the mixture was added to ice water (1L), extracted with EtOAc, the combined organic layers were dried over Na<sub>2</sub>SO<sub>4</sub> and concentrated to get light yellow solid; yield: 75%.

### 1.3.2 3,5-dinitro-1H-pyrazol-4-amine

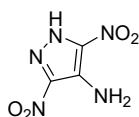

4-chloro-3,5-dinitro-1H-pyrazole (5.3g, 27.6 mmol) was dissolved in aqueous 25% NH<sub>3</sub> (50 mL), the mixture was kept in a stainless steel bomb at an external temperature of 170 °C for 10 h, After cooling, the solution was acidify with 20% H<sub>2</sub>SO<sub>4</sub> to pH=1. The resulting mixture is extracted with EtOAc, and the combined organic layers were dried over Na<sub>2</sub>SO<sub>4</sub>. The solvent was removed in vacuo and the yellow solid was crystallized and filtered; yield: 80%.

### 1.3.3 3,4,5-trinitro1H-pyrazole (HTNP)

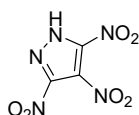

3,5-dinitro-1H-pyrazol-4-amine (1.04 g, 6 mmol) was dissolved in concentrated sulfuric acid (13.6 mL), then slowly add 30% H<sub>2</sub>O<sub>2</sub> (7 ml) in an ice water bath and react at room temperature .After 24 h, the reaction mixture was poured into cold water and extract with EtOAc. The combined organic layers were dried over Na<sub>2</sub>SO<sub>4</sub> and concentrated to get light yellow solid HTNP<sup>6</sup>; yield: 75%.

## 1.4. Synthesis of Energetic Salts of 3,4,5-trinitro-1H-pyrazole

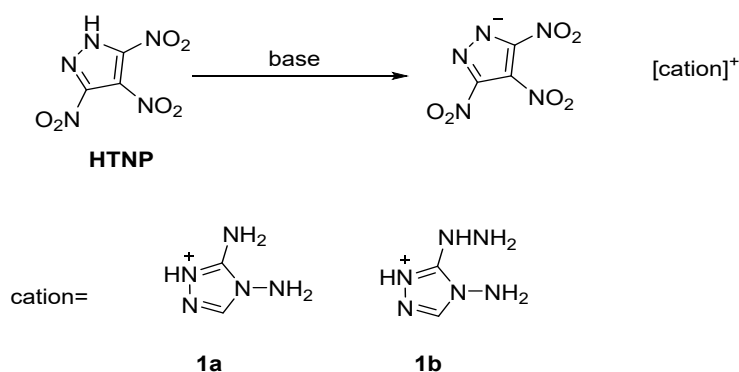

Scheme 5. Synthetic pathway towards energetic salts.

### 1.4.1 Synthesis of 1a

DATr (100 mg, 1mmol) was dissolved in water (5 mL), then TNP aqueous solution (10 mL) was added dropwise, the mixture was stirred at room temperature for 2 h and concentrated to get the product; yield: 85%. <sup>1</sup>H NMR (400 MHz, DMSO-d<sub>6</sub>): δ = 8.44 (1H, s), 8.18 (1H, s), 6.07 (2H, s), ppm; <sup>13</sup>C NMR (125 MHz, DMSO-d<sub>6</sub>): δ = 151.15, 147.29, 142.20, 122.49 ppm; IR (KBr): ν = 3355, 3288, 3138, 1697, 1523, 1516, 1458, 1317, 1230, 962, 846, 623 cm<sup>-1</sup>; MS(ESI<sup>+</sup>): m/z=199.12 [C<sub>2</sub>H<sub>6</sub>N<sub>5</sub><sup>+</sup>]; MS(ESI<sup>-</sup>): m/z= 201.98 [C<sub>3</sub>N<sub>5</sub>O<sub>6</sub><sup>-</sup>].

### 1.4.2 synthesis of 1b

HATr (100 mg, 1mmol) was dissolved in water (5 mL), then TNP aqueous solution (10 mL) was added dropwise, the mixture was stirred at room temperature for 2 h and concentrated to get the product; yield:80%. <sup>1</sup>H NMR (400 MHz, DMSO-d<sub>6</sub>): δ = 8.54 (1H, s), 4.40 (2H, s) ppm; <sup>13</sup>C NMR (125 MHz, DMSO-d<sub>6</sub>): δ = 153.09, 147.13, 143.00, 122.47 ppm; IR (KBr): ν = 3423, 3365, 1704, 1535, 1508, 1454, 1363, 1216, 956, 850 cm<sup>-1</sup>; MS(ESI<sup>+</sup>): m/z=229.14 [C<sub>2</sub>H<sub>7</sub>N<sub>6</sub><sup>+</sup>]; MS(ESI<sup>-</sup>): m/z= 201.98 [C<sub>3</sub>N<sub>5</sub>O<sub>6</sub><sup>-</sup>].

## 2. X-ray Crystallographic Data

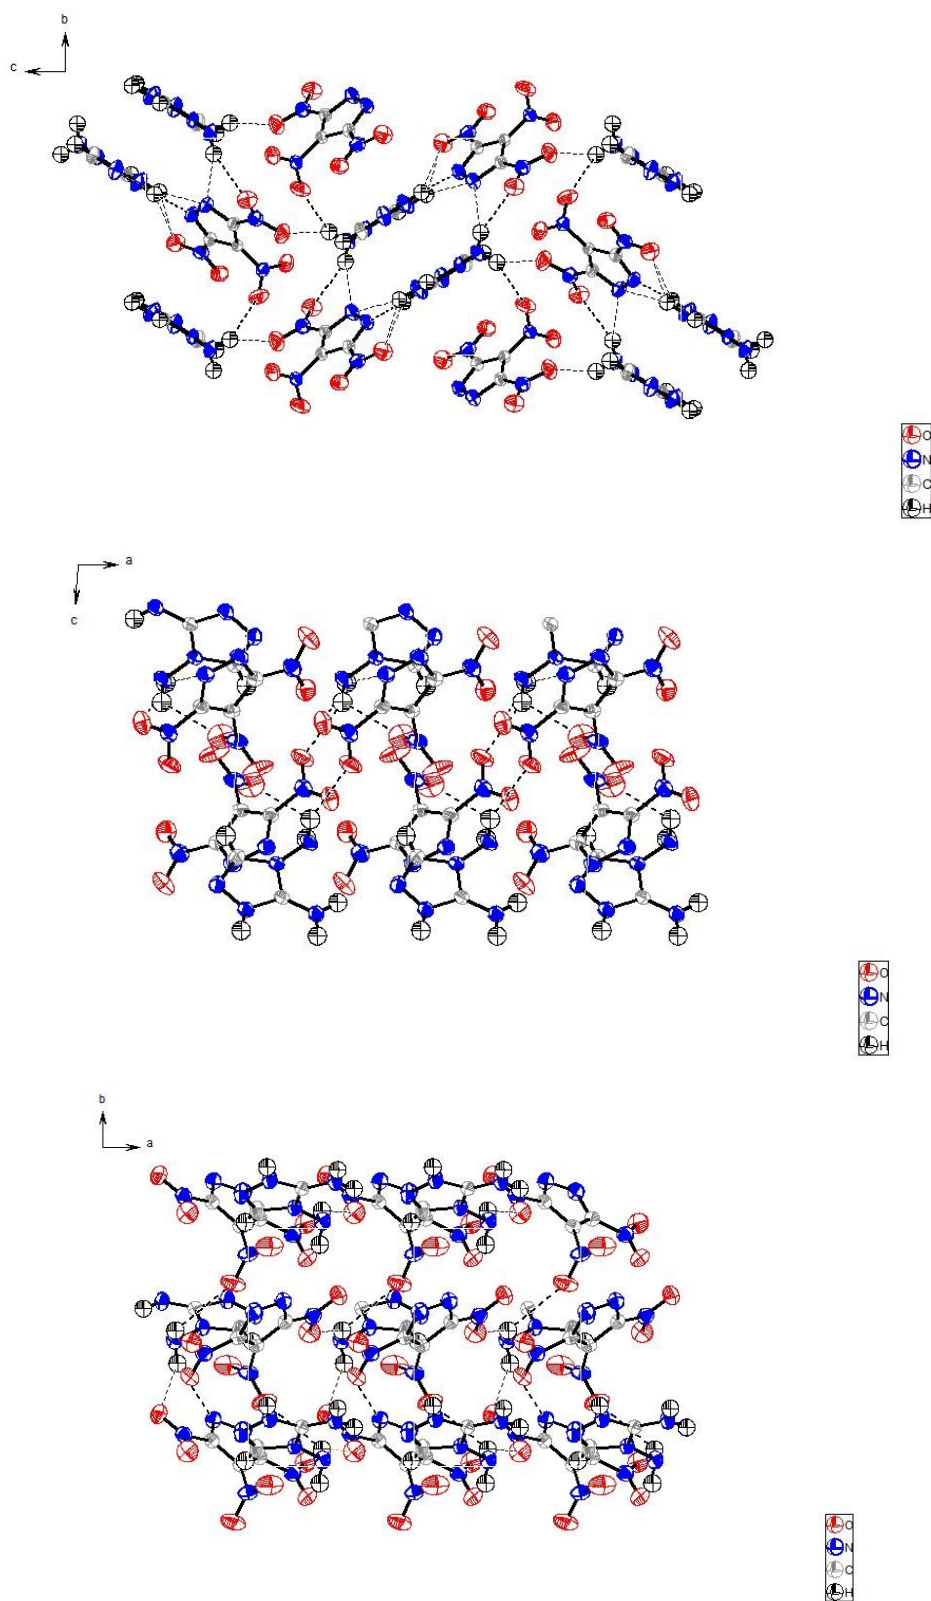

**Figure S1.** Crystallographic packing diagram graph of **1a**, direction from *a*, *b*, *c* axis, respectively.

**Table S1.** Crystallographic data of **1a**

| Crystal                                      | <b>1a</b>                                                            |
|----------------------------------------------|----------------------------------------------------------------------|
| Chemical formula                             | C <sub>5</sub> H <sub>6</sub> N <sub>10</sub> O <sub>6</sub>         |
| Formula mass                                 | 302.20                                                               |
| Crystal system                               | monoclinic                                                           |
| a/Å                                          | 6.1145(5)                                                            |
| b/Å                                          | 8.7498(8)                                                            |
| c/Å                                          | 21.6564(19)                                                          |
| $\alpha$ /o                                  | 90                                                                   |
| $\beta$ /o                                   | 94.974(6)                                                            |
| $\gamma$ /o                                  | 90                                                                   |
| Volume/Å <sup>3</sup>                        | 1154.27(17)                                                          |
| Temperature/K                                | 296.15                                                               |
| Space group                                  | P2 <sub>1</sub> /c                                                   |
| Z                                            | 4                                                                    |
| Radiation type                               | MoK $\alpha$ ( $\lambda$ = 0.71073)                                  |
| $\mu$ /mm <sup>-1</sup>                      | 0.157                                                                |
| Density <sub>calcd</sub> /g cm <sup>-3</sup> | 1.739                                                                |
| F(000)                                       | 616                                                                  |
| 2 $\theta$ range for data collection/°       | 3.776 to 55.076                                                      |
| Index ranges                                 | -7 $\leq$ h $\leq$ 7, -11 $\leq$ k $\leq$ 11, -27 $\leq$ l $\leq$ 28 |
| Reflections collected                        | 14294                                                                |
| Independent reflections                      | 2635 [R <sub>int</sub> = 0.0355, R <sub>sigma</sub> = 0.0280]        |
| Data/restraints/parameters                   | 2635/0/190                                                           |
| R1 / wR2 [all data]                          | 0.0562/ 0.1021                                                       |
| R1 / wR2 [I > 2 $\sigma$ (I)]                | 0.0382/ 0.0921                                                       |
| Goodness-of-fit on F <sup>2</sup>            | 1.025                                                                |
| CCDC number                                  | 2240955                                                              |

**Table S2.** Selected bond lengths [Å] and angles [°] for compound **1a**

| Parameter | Bond length (Å) | Parameter | Bond length (Å) |
|-----------|-----------------|-----------|-----------------|
| O5-N3     | 1.2228(18)      | N5-C3     | 1.432(2)        |
| O2-N5     | 1.2195(18)      | C4-C5     | 1.378(2)        |
| O3-N4     | 1.2033(19)      | C4-C3     | 1.378(2)        |
| O6-N3     | 1.2223(19)      | N10-N7    | 1.4033(17)      |
| O1-N5     | 1.2277(18)      | N10-C1    | 1.3501(19)      |
| O4-N4     | 1.2115(19)      | N10-C2    | 1.365(2)        |
| N2-N1     | 1.3443(19)      | N8-N9     | 1.3819(19)      |
| N2-C5     | 1.3385(19)      | N8-C1     | 1.3221(19)      |
| N1-C3     | 1.336(2)        | N6-C1     | 1.311(2)        |
| N4-C4     | 1.4494(19)      | N9-C2     | 1.287(2)        |
| N3-C5     | 1.436(2)        |           |                 |
| Parameter | Bond angle (°)  | Parameter | Bond angle (°)  |
| C5-N2-N1  | 106.85(13)      | N2-C5-C4  | 111.81(13)      |
| C3-N1-N2  | 107.95(12)      | C4-C5-N3  | 127.38(14)      |
| O3-N4-O4  | 124.92(15)      | N1-C3-N5  | 120.35(13)      |
| O3-N4-C4  | 118.09(14)      | N1-C3-C4  | 111.21(14)      |
| O4-N4-C4  | 116.99(15)      | C4-C3-N5  | 128.37(15)      |
| O5-N3-C5  | 116.36(14)      | C1-N10-N7 | 121.46(13)      |
| O6-N3-O5  | 125.22(15)      | C1-N10-C2 | 107.25(12)      |
| O6-N3-C5  | 118.41(14)      | C2-N10-N7 | 131.28(13)      |
| O2-N5-O1  | 124.40(15)      | C1-N8-N9  | 111.40(13)      |
| O2-N5-C3  | 117.56(13)      | C2-N9-N8  | 104.48(14)      |
| O1-N5-C3  | 118.03(14)      | N8-C1-N10 | 105.59(13)      |
| C5-C4-N4  | 128.91(14)      | N6-C1-N10 | 124.95(13)      |
| C5-C4-C3  | 102.17(13)      | N6-C1-N8  | 129.42(14)      |
| C3-C4-N4  | 128.90(14)      | N9-C2-N10 | 111.27(15)      |
| N2-C5-N3  | 120.72(14)      |           |                 |



**Table S3.** Hydrogen bonds present in compound **1a**

| D-H...A                             | d(D-H)/<br>Å | d(H...A)/<br>Å | d(D...A)/ Å | <(D-H-A)/ ° |
|-------------------------------------|--------------|----------------|-------------|-------------|
| N(8)-H(8)···O(1)                    | 0.86         | 2.54           | 3.125(2)    | 126.4       |
| N(8)-H(8)···N(1)                    | 0.86         | 1.98           | 2.810(18)   | 160.6       |
| N(6)-H(6A)···O(1)                   | 0.86         | 2.51           | 3.112(19)   | 128.7       |
| N(6)-H(6A)<br>···N(2 <sup>1</sup> ) | 0.86         | 2.43           | 3.166(19)   | 144.8       |
| N(6)-H(6B)···N(9 <sup>1</sup> )     | 0.86         | 2.14           | 2.976(19)   | 163.0       |
| N(7)-H(7A)<br>···O(6 <sup>2</sup> ) | 0.86         | 2.43           | 3.156(19)   | 142.1       |
| N(7)-H(7A)<br>···N(2 <sup>2</sup> ) | 0.86         | 2.48           | 3.252(2)    | 149.6       |
| N(7)-H(7B)···O(5 <sup>3</sup> )     | 0.87         | 2.32           | 3.017(17)   | 137.5       |
| N(7)-H(7B)···O(4 <sup>4</sup> )     | 0.87         | 2.89           | 3.475(2)    | 126.3       |
| C(2)-H(2)···O(3 <sup>5</sup> )      | 0.93         | 2.68           | 2.360(2)    | 130.5       |

### 3. Characterization analysis

#### 3.1. <sup>1</sup>H NMR spectra

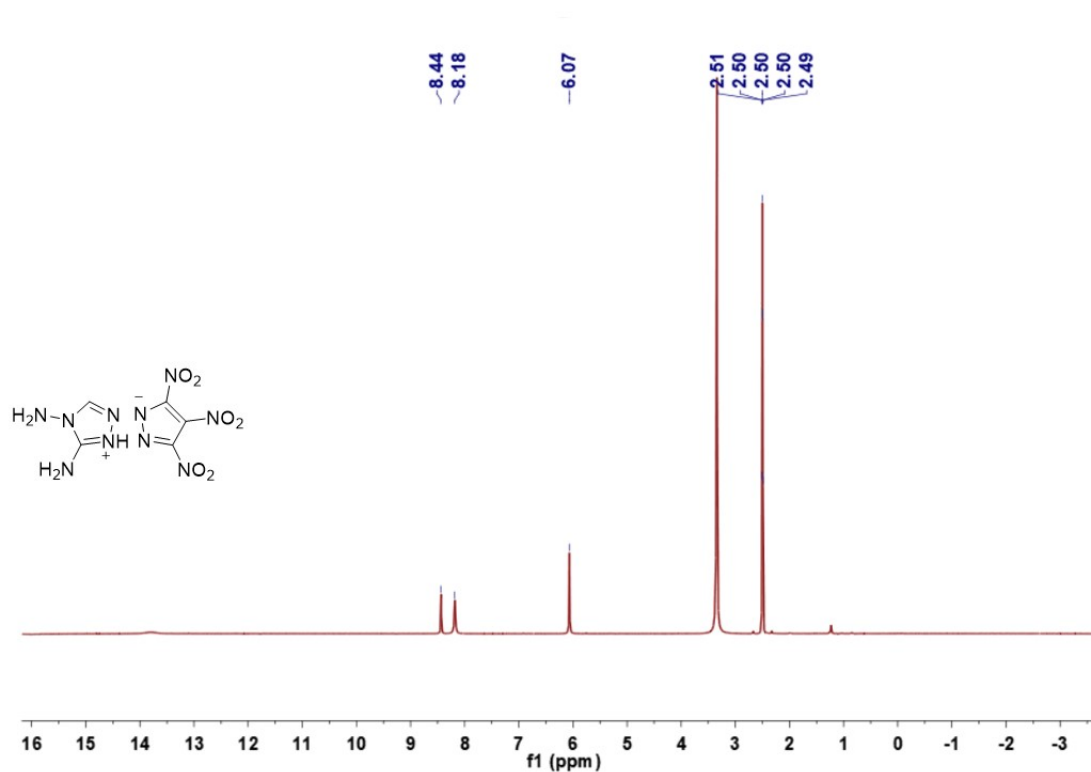**Figure S2.** <sup>1</sup>H NMR spectra (400 MHz) of **1a** in [D<sub>6</sub>] DMSO

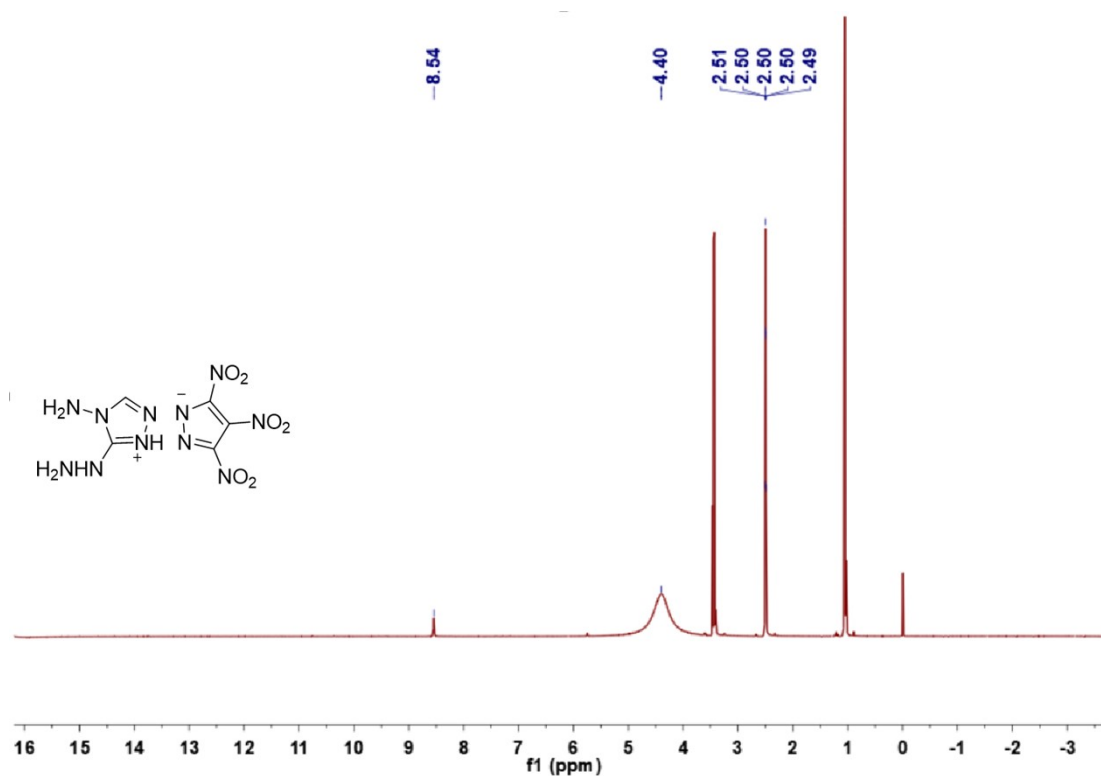

Figure S3. <sup>1</sup>H NMR spectra (400 MHz) of **1b** in [D<sub>6</sub>] DMSO

### 3.2. <sup>13</sup>C NMR spectra

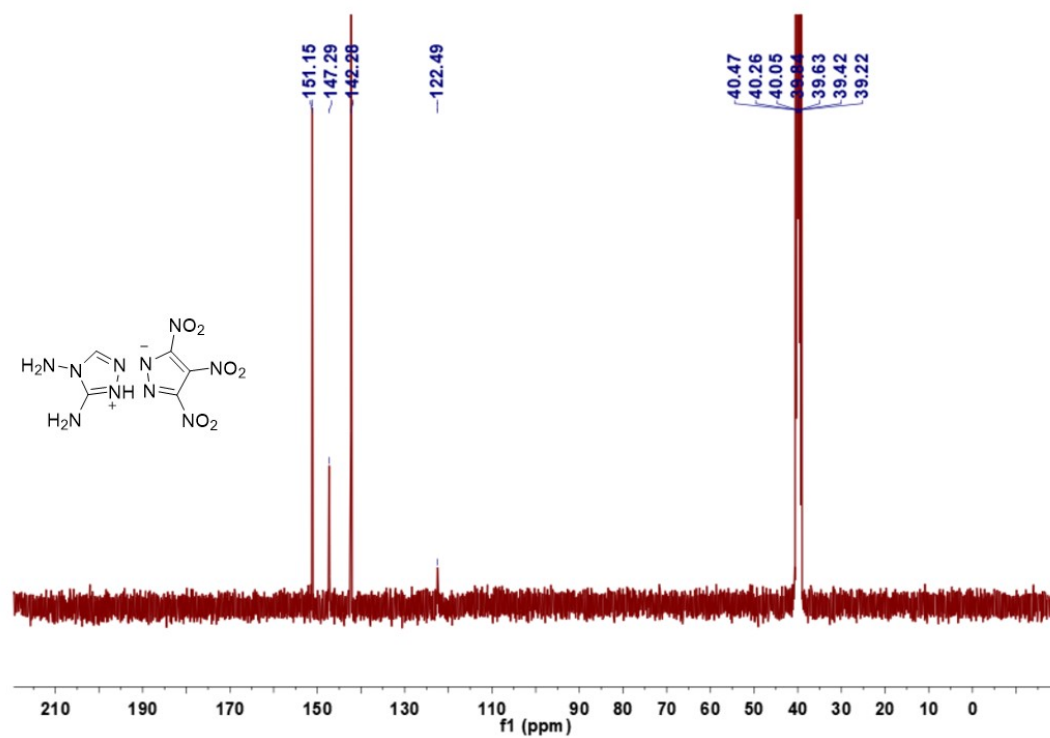

Figure S4. <sup>13</sup>C NMR spectra (125 MHz) of **1a** in [D<sub>6</sub>] DMSO

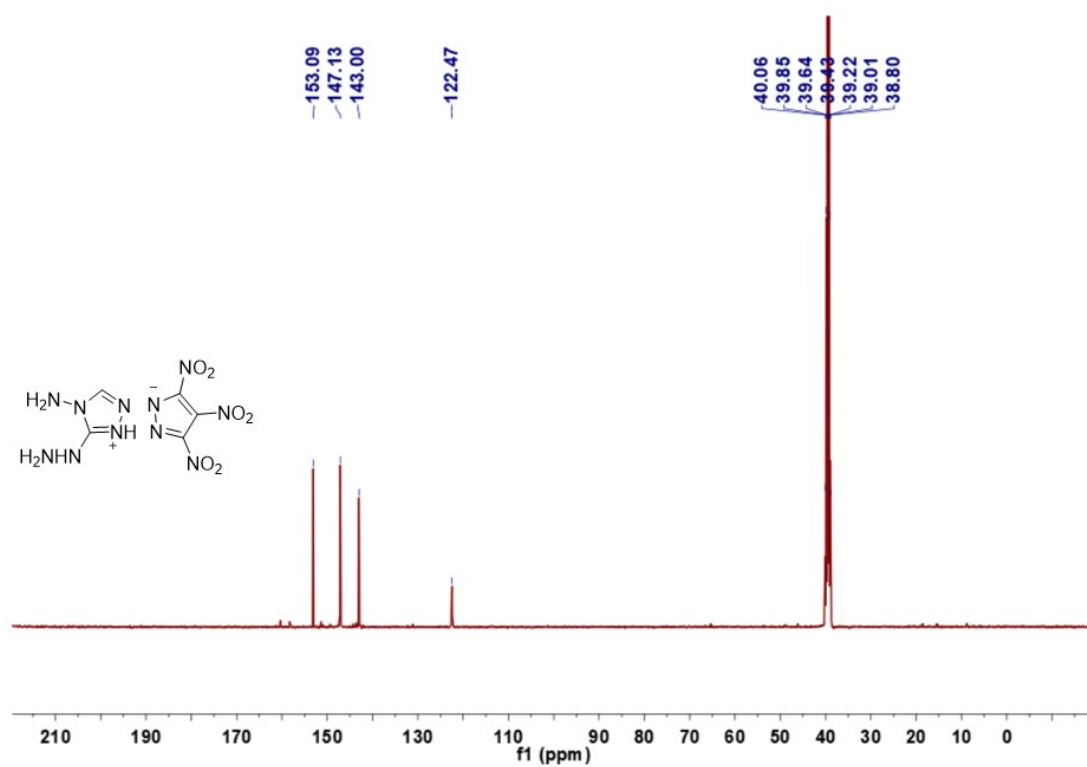

Figure S5. <sup>13</sup>C NMR spectra (125 MHz) of **1b** in [D<sub>6</sub>] DMSO

### 3.3. Mass spectra

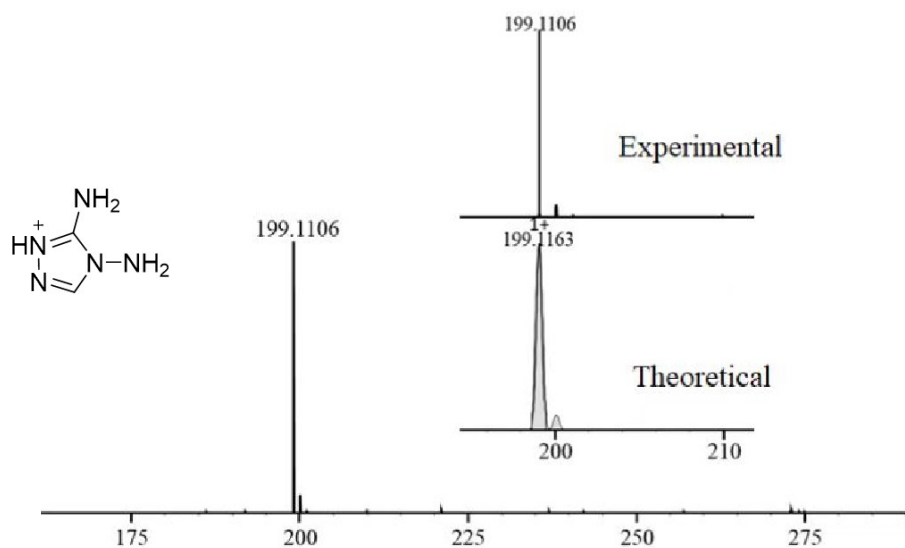

Figure S6. ESI-MS(DEI<sup>+</sup>) spectrum of complex **1a**

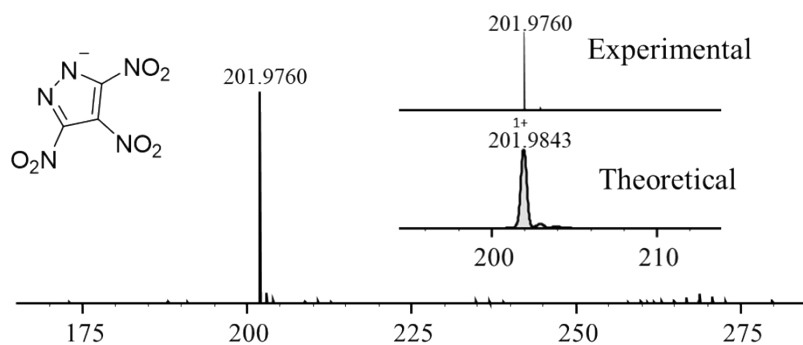

**Figure S7.** ESI-MS(DEI<sup>-</sup>) spectrum of complex **1a**

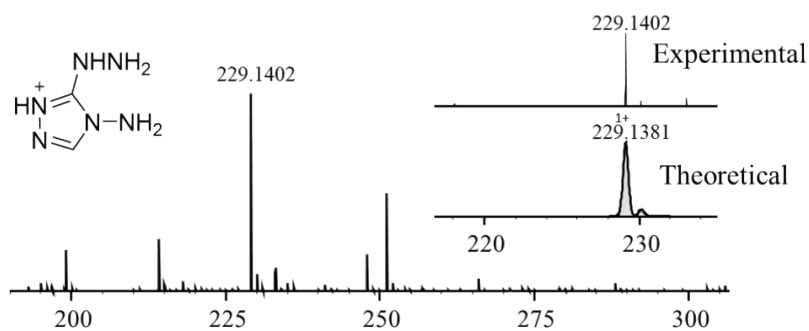

**Figure S8.** ESI-MS(DEI<sup>+</sup>) spectrum of complex **1b**

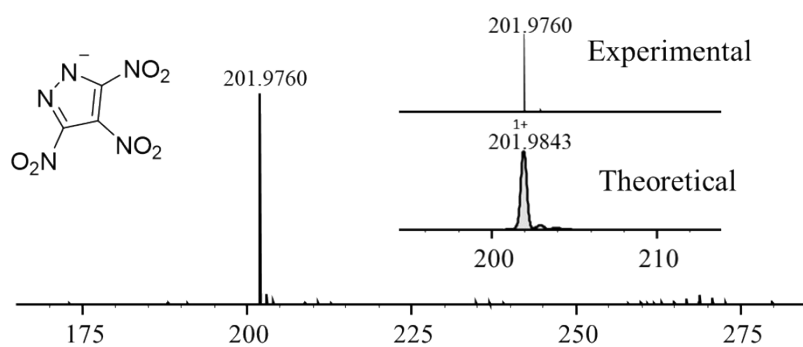

**Figure S9.** ESI-MS(DEI<sup>-</sup>) spectrum of complex **1b**

### 3.4. IR spectra

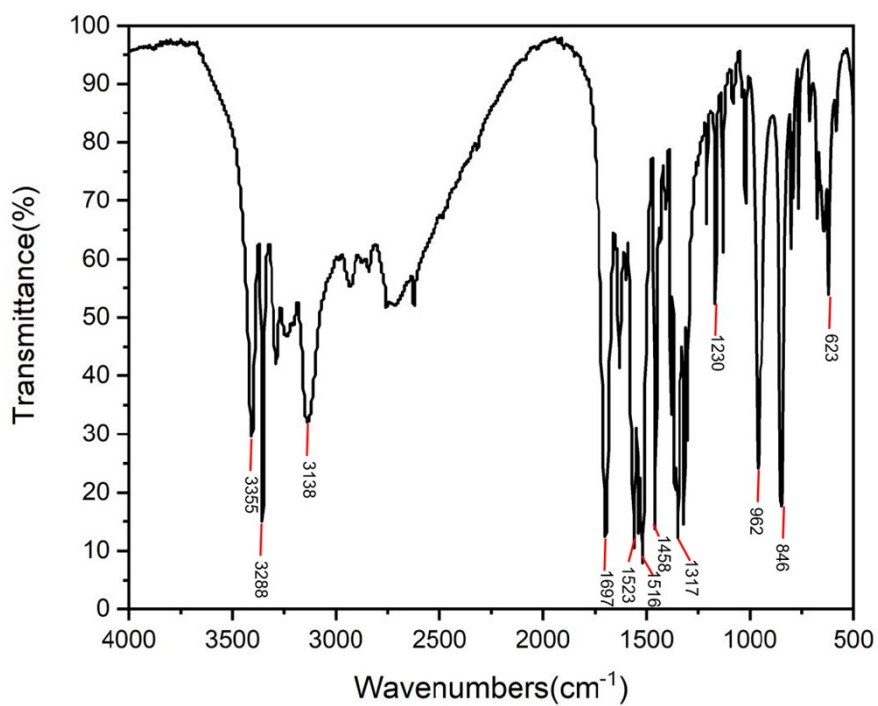

Figure S10. IR spectrum of complex 1a

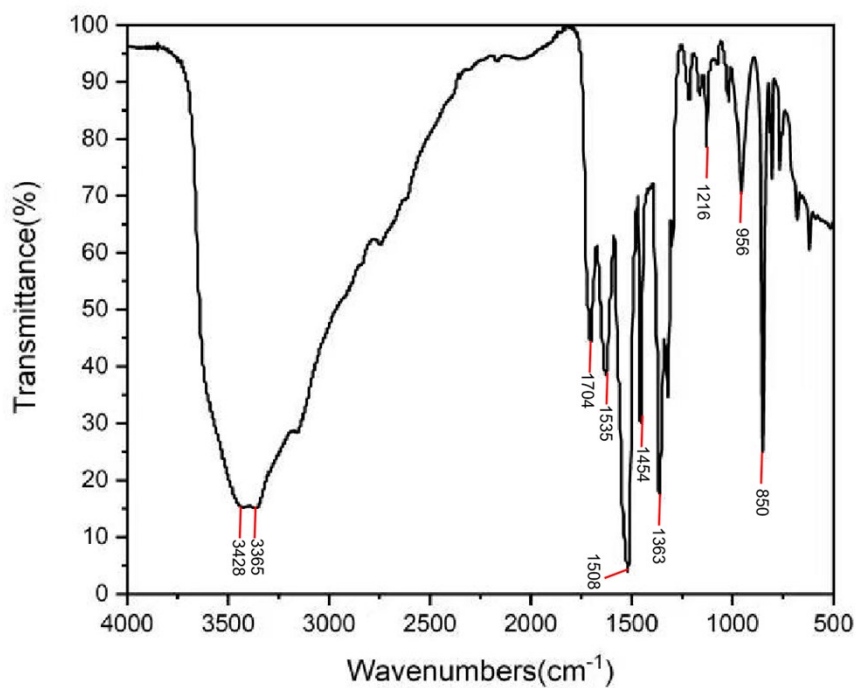

Figure S11. IR spectrum of complex 1b

#### 4. Computational Details

The geometric optimization and frequency analyses were carried out by using B3LYP functional analyses with the 6-31+G\*\* basis set. All of the optimized structures were determined to be the local energy minima on the potential energy surface without imaginary frequencies. Single-point energies were calculated at the MP2/6-311++G\*\* level. All computations in this work were performed by using the Gaussian 09 suites of program<sup>7</sup>. The gas-phase heats of formation were calculated using the isodesmic reaction method<sup>8</sup>. In order to explore the effect on mechanical sensitivity, the Hirshfeld surface analysis was commutated based upon the optimized geometry.

#### 5. Heat of Formation Calculation

The heats of formation of energetic materials mostly are calculated theoretically, thus avoid the experimental complication. The heats of formation of all cations and anions were computed by the isodesmic reaction method<sup>8</sup>. The lattice energy ( $U_L$ ) and lattice enthalpy ( $\Delta H_L$ ) were calculated by the equation provided by Jenkins and Glasser<sup>9</sup>. According to the Born-Haber energy cycles<sup>10</sup>, the heats of formation of energetic salts can be obtained by Eq.1. And the heats of formation ( $\Delta H_m$ ) for solid state were used to calculate the energies of formation ( $\Delta U_m$ ) according to Eq. 2.

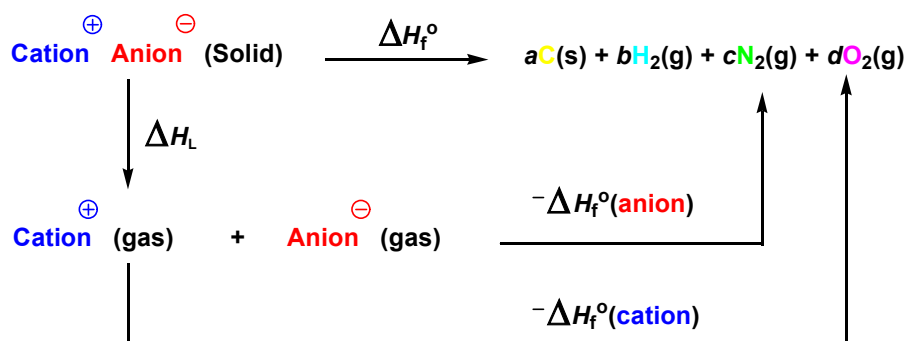

**Scheme 6.** Born-Haber Cycle for the formation of DNABT-based energetic salts

$$\Delta H_f^{\circ}(\text{ionic salt, 298 K}) = \Delta H_f^{\circ}(\text{cation, 298 K}) + \Delta H_f^{\circ}(\text{anion, 298 K}) - \Delta H_L \quad (1)$$

$$\Delta U_m = \Delta H_m - \Delta n RT \quad (2)$$

## 6. Hirshfeld Analysis

(a)

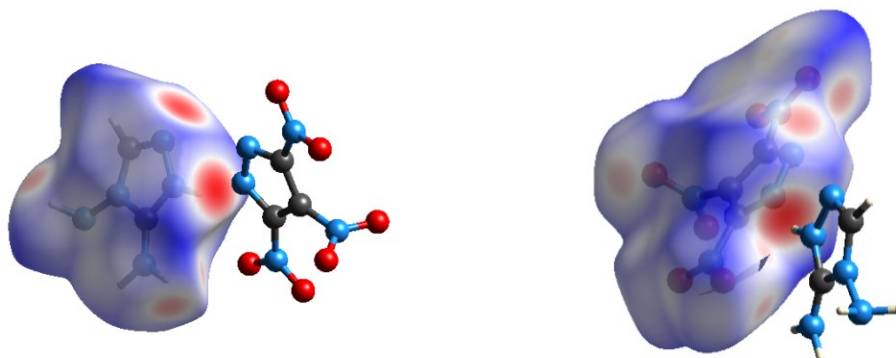

(b)

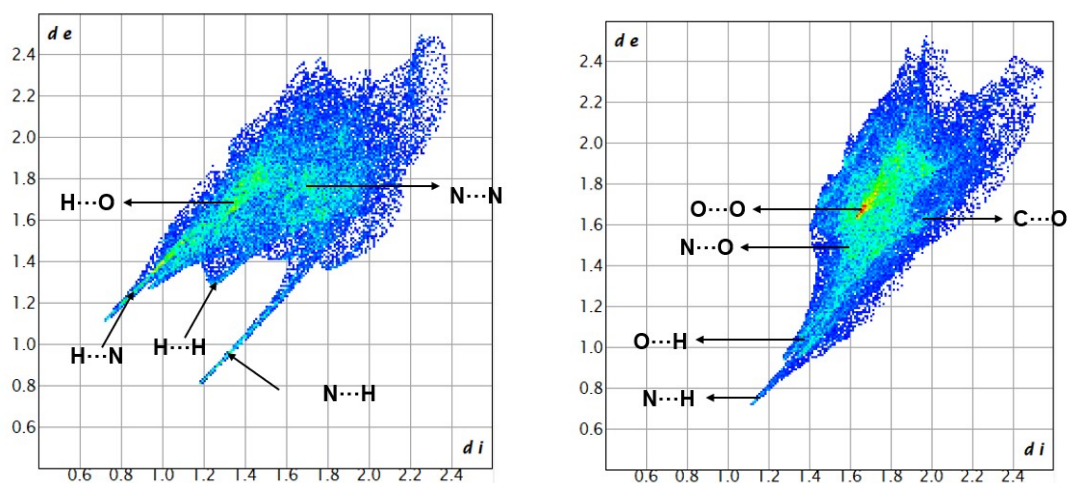

(c)

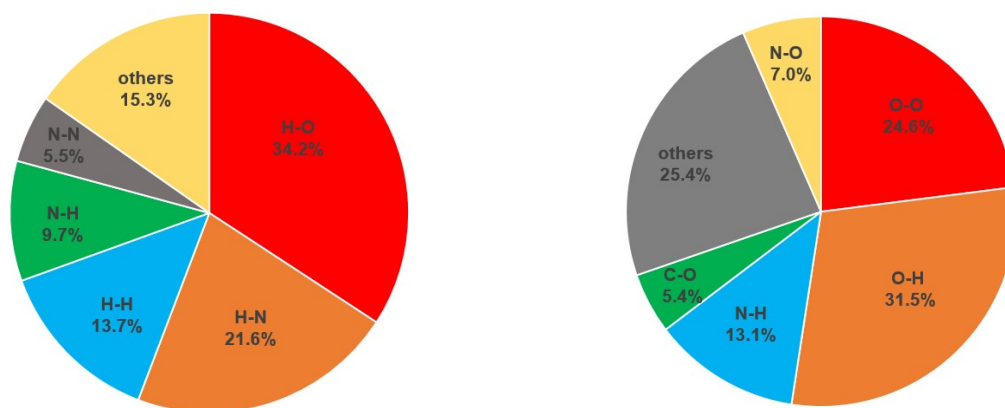

**Figure S12.** (a) Hirshfeld surface of **1a** mapped on  $d_{\text{norm}}$ , red and blue parts indicate strong and weak close contacts, respectively; (b) the two-dimensional fingerprint plot of **1a**, (c) individual atomic contacts percentage contribution to Hirshfeld surface for **1a**.

## 7. Optimization

TNP-

E= -834.865233 (a.u.)

-1 0

|   |             |             |             |
|---|-------------|-------------|-------------|
| O | 2.75504600  | 0.85388900  | 0.00110300  |
| O | -2.75500800 | 0.85395700  | -0.00036900 |
| O | 0.00104400  | 2.19914000  | -1.09193700 |
| O | 3.31760300  | -1.26104800 | -0.00114000 |
| O | -3.31766300 | -1.26096000 | -0.00041900 |
| O | -0.00091400 | 2.19913800  | 1.09175500  |
| N | 0.00003500  | 1.63613800  | -0.00005800 |
| N | 2.47784800  | -0.35742600 | 0.00003200  |
| N | -2.47787300 | -0.35736500 | -0.00021400 |
| C | -0.00001500 | 0.18047500  | -0.00006400 |
| C | 1.08673500  | -0.69788600 | 0.00015700  |
| C | -1.08678300 | -0.69787900 | 0.00021800  |
| N | -0.66207200 | -1.98790400 | 0.00056900  |
| N | 0.66199300  | -1.98789900 | 0.00055600  |



## 8. References

1. O. V. Dolomanov, L. J. Bourhis, R. J. Gildea, J. A. K. Howard and H. Puschmann, *J. Appl. Crystallogr.*, 2009, **42**, 339-341.
2. Sheldrick, G. SHELXTI93, Program for crystal structure refinement, 1997.
3. A. L. Spek, *J. Appl. Crystallogr.*, 2003, **36**, 7-13.
4. L. K. S. H. Emilsson K, *Eur. J. Med. Chem.*, 1986, **21**, 235-244.
5. P. Cardillo, M. Dellavedova, L. Gigante, A. Lunghi, C. Pasturenzi, E. Salatelli and P. Zanirato, WILEY-VCH Verlag, Weinheim, Editon edn., 2012, vol. 2012, pp. 1195-1201.
6. I. L. Dalinger, I. A. Vatsadze, T. K. Shkineva, G. P. Popova and S. A. Shevelev, *Synthesis*, 2012, **44**, 2058-2064.
7. M. J. Frisch, G. W. Trucks, H. B. Schlegel, G. E. Scuseria, M. A. Robb, J. R. Cheeseman, J. A. Montgomery, Jr., T. Vreven, K. N. Kudin, J. C. Burant, J. M. Millam, S. S. Iyengar, J. Tomasi, V. Barone, B. Mennucci, M. Cossi, G. Scalmani, N. Rega, G. A. Petersson, H. Nakatsuji, M. Hada, M. Ehara, K. Toyota, R. Fukuda, J. Hasegawa, M. Ishida, T. Nakajima, Y. Honda, O. Kitao, H. Nakai, M. Klene, X. Li, J. E. Knox, H. P. Hratchian, J. B. Cross, V. Bakken, C. Adamo, J. Jaramillo, R. Gomperts, R. E. Stratmann, O. Yazyev, A. J. Austin, R. Cammi, C. Pomelli, J. W. Ochterski, P. Y. Ayala, K. Morokuma, G. A. Voth, P. Salvador, J. J. Dannenberg, V. G. Zakrzewski, S. Dapprich, A. D. Daniels, M. C. Strain, O. Farkas, D. K. Malick, A. D. Rabuck, K. Raghavachari, J. B. Foresman, J. V. Ortiz, Q. Cui, A. G. Baboul, S. Clifford, J. Cioslowski, B. B. Stefanov, G. Liu, P. Iiskorz, I. Komaromi, R. L. Martin, D. J. Fox, T. Keith, M. A. Al-Laham, C. Y. Peng, A. Nanayakkara, M. Challacombe, P. M. W. Gill, B. Johnson, W. Chen, M. W. Wong, C. Gonzalez and J. A. Pople, GAUSSIAN 9 (Revision A.01), Gaussian, Inc, 2009.
8. Z. ZENG, H. GAO, B. TWAMLEY and J. M. SHREEVE, *J. Mater. Chem. C*, 2007, **17**, 3819-3826.
9. H. D. B. Jenkins, D. Tudela and L. Glasser, *Inorg. Chem.*, 2002, **41**, 2364-2367.
10. H. Gao, C. Ye, C. M. Piekarski and J. M. Shreeve, *J. Phys. Chem. C*, 2007, **111**, 10718-10731.
